# Supplementary material for: Motorized, untethered soft robots via 3D printed auxetics
Source: Royal Society of Chemistry journal article supplement (doi:10.1039/d2sm00779g), 2022-01-01
Supplement: d2sm00779g5.pdf [file d2sm00779g5.pdf]

## Electronic Supplementary Information

for

### **Motorized, untethered soft robots via 3D printed auxetics**

Pranav Kaarthik,<sup>1</sup> Francesco L. Sanchez,<sup>1</sup> James Avtges,<sup>2</sup> and Ryan L. Truby<sup>1,2,3\*</sup>

<sup>1</sup>Department of Mechanical Engineering, Northwestern University, Evanston, IL, USA

<sup>2</sup>Center for Robotics and Biosystems, Northwestern University, Evanston, IL, USA

<sup>3</sup>Department of Materials Science and Engineering, Northwestern University, Evanston, IL USA

Correspondence to: [rtruby@northwestern.edu](mailto:rtruby@northwestern.edu)

#### **Contents:**

Table S1 – S3

Figures S1 – S6

Movies S1 – S4

**Table S1.** Mechanical Properties of EnvisionTec Print Resins

| <b>Material</b>    | <b>Elongation at Break (%)</b> | <b>Shore Hardness</b> | <b>Tensile Strength (MPa)</b> |
|--------------------|--------------------------------|-----------------------|-------------------------------|
| Rigid PU Black     | 173                            | D73                   | 20.6                          |
| Rigidform Charcoal | 6-7                            | D87                   | 68-73                         |
| ABS Tough          | 3.5                            | D86                   | 66                            |
| HTM 140            | 3.5                            | N/A                   | 56                            |
| Rigid PU White     | 120                            | D78                   | 34                            |

**Table S2.** Cyclic Extension Testing of HSAs

| <b>HSA Scaling</b> | <b>Number of extension cycles programmed for experiment</b> | <b>Cycle at first strut/hinge failing event</b> | <b>Cycle at complete HSA failure</b> |
|--------------------|-------------------------------------------------------------|-------------------------------------------------|--------------------------------------|
| 1x                 | 1000                                                        | 480                                             | N/A (no complete failure)            |
| 0.75x              | 1000                                                        | 230                                             | 265                                  |
| 0.5x               | 1000                                                        | 250                                             | 300                                  |
| 0.3x               | 1000                                                        | 100                                             | 233                                  |

**Table S3.** Operating Time and Walking Speeds of Reported Untethered Soft Robots

| Citation                                                                                                                                                                        | Operating Time (min) | Speed (BL/s)     | Actuation Category |
|---------------------------------------------------------------------------------------------------------------------------------------------------------------------------------|----------------------|------------------|--------------------|
| He, Q., Z. Wang, Y. Wang, A. Minori, M. T. Tolley and S. Cai, <i>Science Advances</i> , 2019, 5, eaax5746.                                                                      | 30                   | 0.017            | LCE                |
| Huang, X., K. Kumar, M. K. Jawed, A. M. Nasab, Z. Ye, W. Shan and C. Majidi, <i>Science Robotics</i> , 2018, 3, eaau7557.                                                       | 23                   | 1                | SMA                |
| Huang, X., K. Kumar, M. K. Jawed, A. Mohammadi Nasab, Z. Ye, W. Shan and C. Majidi, <i>Advanced Materials Technologies</i> , 2019, 4, 1800540.                                  | 23                   | 0.56             | SMA                |
| Ji., X., X. Liu, V. Cacucciolo, M. Imboden, Y. Civet, A. El Haitami, S. Cantin, Y. Perriard and H. Shea, <i>Science Robotics</i> , 2019, 4, eaaz6451.                           | 1                    | 0.3              | DEA                |
| Cao, L. Qin, H. P. Lee and J. Zhu, <i>Electroactive Polymer Actuators and Devices (EAPAD) 2017</i> , 2017, pp. 322–328.                                                         | 30                   | 0.02             | DEA                |
| Duggan, T., L. Horowitz, A. Ulug, E. Baker and K. Petersen, <i>2019 2<sup>nd</sup> IEEE International Conference on Soft Robotics (RoboSoft)</i> , 2019, pp. 200-205.           | 28<br>12             | 0.019<br>0.00139 | DEA<br>DEA         |
| Must, I. F., I. Kaasik, L. Põldsalu, U. Mihkels, A. Johanson, A. Punning, and A. Aabloo, <i>Advanced Engineering Materials</i> , 2015, 17, 84-94.                               | 8                    | 0.016            | EAP                |
| Qi, M., Y. Zhu, Z. Liu, X. Zhang, X. Yan, and L. Lin, <i>2017 IEEE 30<sup>th</sup> International Conference on Micro Electro Mechanical Systems (MEMS)</i> , 2017, pp. 761-764. | 0.17                 | 1.5              | EAP                |
| Goldberg, B., R. Zufferey, N. Doshi, E. F. Helbling, G. Whittredge, M. Kovac, R. J. Wood, <i>IEEE Robotics and Automation Letters</i> , 2018, 3, 987-993.                       | 4.5                  | 3.8              | EAP                |
| Bartlett, N. W., M. T. Tolley, J. T. B. Overvelde, J. C. Weaver, B. Mosadegh, K. Bertoldi, G. M. Whitesides and R. J. Wood, <i>Science</i> , 2015, 161–165.                     | 0.033                | 0.83             | Combustion         |
| Yang, L. Chang and N. O. Pérez-Arancibia, <i>Science Robotics</i> , 2020, 5, eaba0015.                                                                                          | 3.33                 | 0.023            | Combustion         |
| Drotman, D., S. Jadhav, D. Sharp, C. Chan and M. T. Tolley, <i>Science Robotics</i> , 2021, 6, eaay2627.                                                                        | 4                    | 0.09             | Pneumatic          |
| Rafsanjani, A., Y. Zhang, B. Liu, S. M. Rubinstein and K. Bertoldi, <i>Science Robotics</i> , 2018, 3, eaar7555.                                                                | 30                   | 0.025            | Pneumatic          |
| Tolley, M. T., R. F. Shepherd, B. Mosadegh, K. C. Galloway, M. Wehner, M. Karpelson, R. J. Wood and G. M. Whitesides, <i>Soft Robotics</i> , 2014, 1, 213–223.                  | 120                  | 0.0078           | Pneumatic          |
| Li, S., A. Awale, K. E. Bacher, T. J. Buchner, C. Della Santina, R. J. Wood and D. Rus, <i>Soft Robotics</i> , 2022, 9, 324–336.                                                | 45                   | 0.0106           | Pneumatic          |
| Usevitch, N. S., Z. M. Hammond, M. Schwager, A. M. Okamura, E. W. Hawkes and S. Follmer, <i>Science Robotics</i> , 2020, 5, eaaz0492.                                           | 32                   | 0.035            | Motorized          |
| Gong, S., J. Wu, T. Zheng, W.-M. Zhang and L. Shao, <i>2021 27th International Conference on Mechatronics and Machine Vision in Practice (M2VIP)</i> , 2021, pp. 417–422.       | 18                   | 0.65             | Motorized          |
| This work                                                                                                                                                                       | 65                   | 0.031            | HSA robot          |

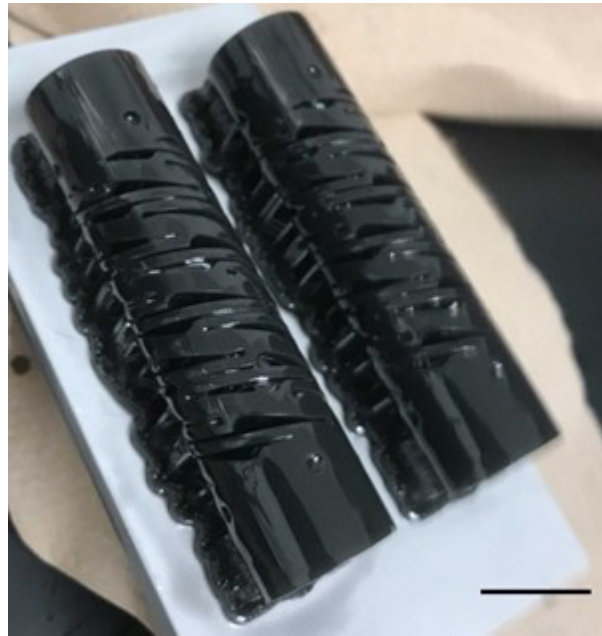

**Figure S1.** Photograph of two 1x HSAs immediately after printing. Scale bar represents 20 mm.

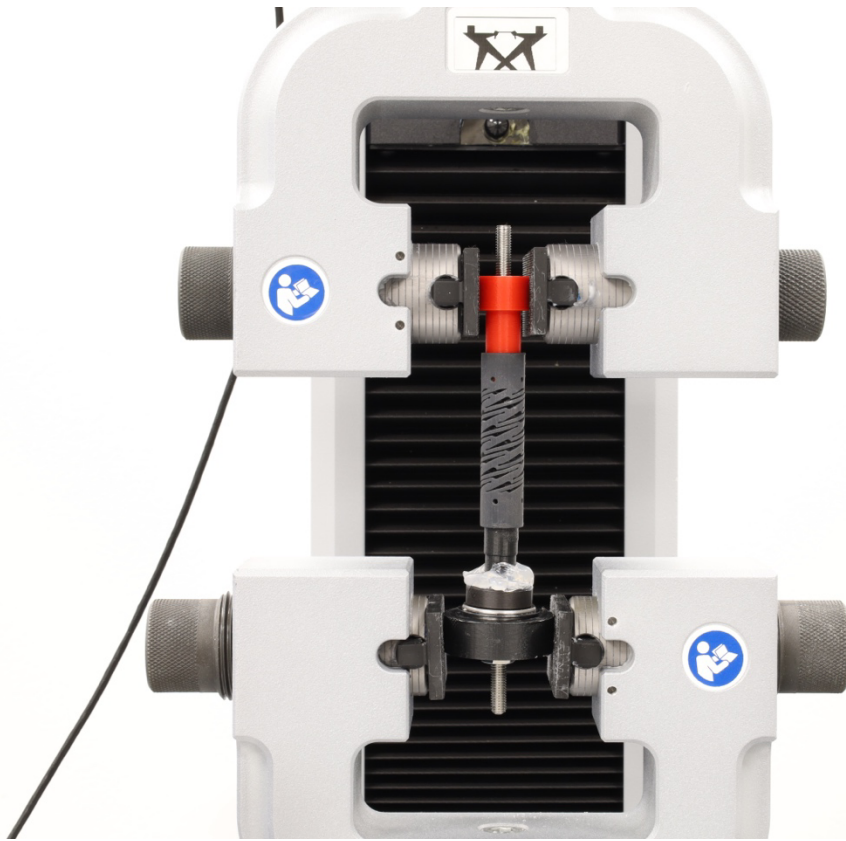

**Figure S2.** Mechanical testing set-up for tensile and cyclic extension characterization of HSAs. A 0.5x HSA is shown.

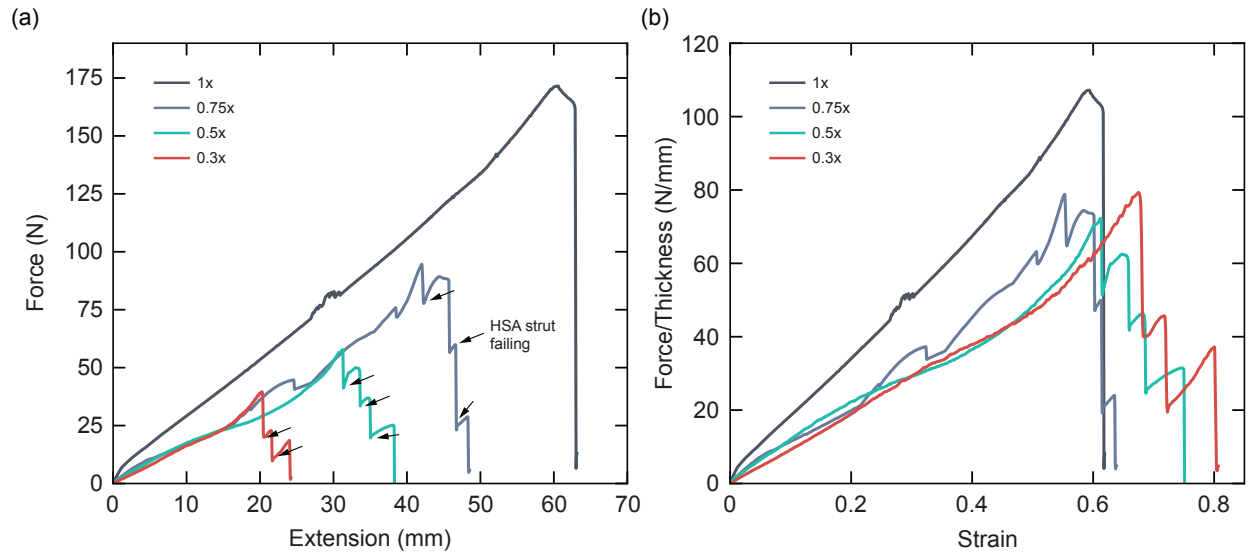

**Figure S3.** Mechanical characterization of HSAs. (a) Force versus extension data from tensile extension tests to failure are shown for 1x, 0.75x, 0.5x, 0.3x HSAs. Data for one HSA of each scaling is shown, with arrows indicating failures of individual struts prior to critical failure. (b) The same force data from (a) is shown normalized by HSA thickness and plotted versus strain.

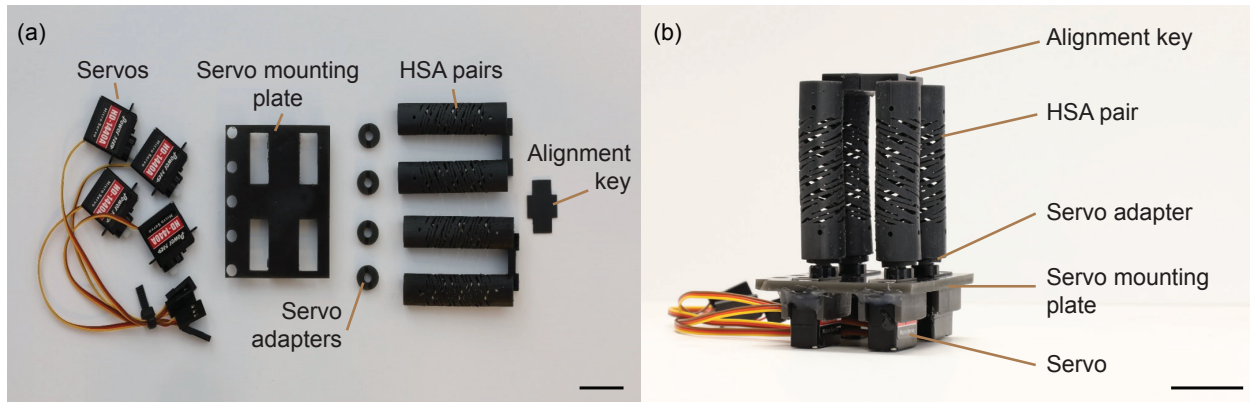

**Figure S4.** HSA leg assembly. (a) An unassembled HSA leg is shown with all its constituent components. (b) An assembled HSA leg is shown. It consists of two HSA pairs mounted to four servo motors via 3D printed adapters. The alignment key aligns the two HSA pairs at the distal end of the leg. Scale bars are 20 mm.

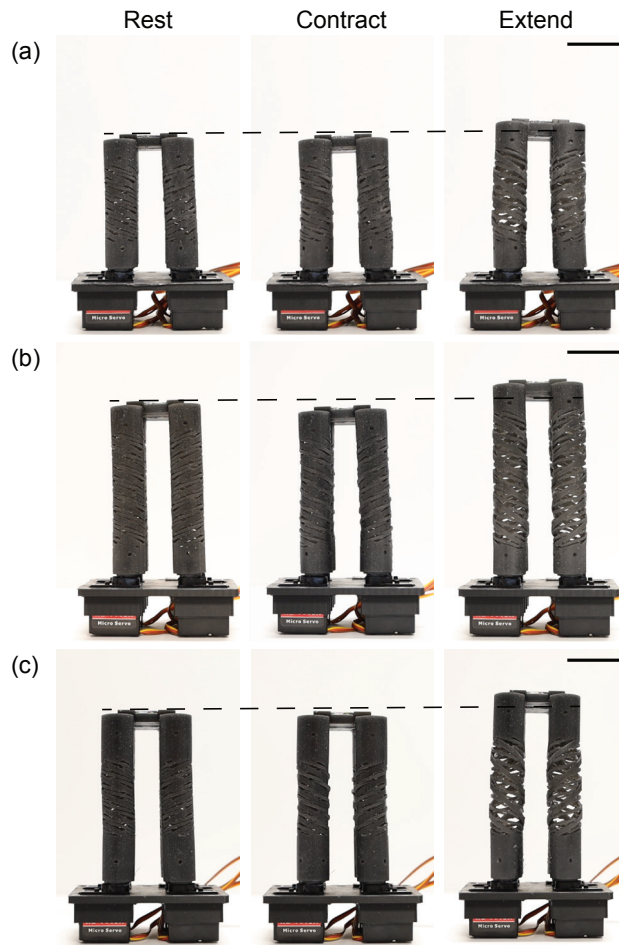

**Figure S5.** Multi-DOF HSA leg contraction and extension. The (a) 0.5x Leg, (b) Elongated 0.5x Leg, and (c) Stilted 0.5x Leg are shown at rest, and in their contracted and extended states. Dashed lines indicate the position of the distal end of each leg at rest for comparison with the contracted and extended states. The photographs are stills from Movies S1-S3 in the ESI. Scale bars are 20 mm.



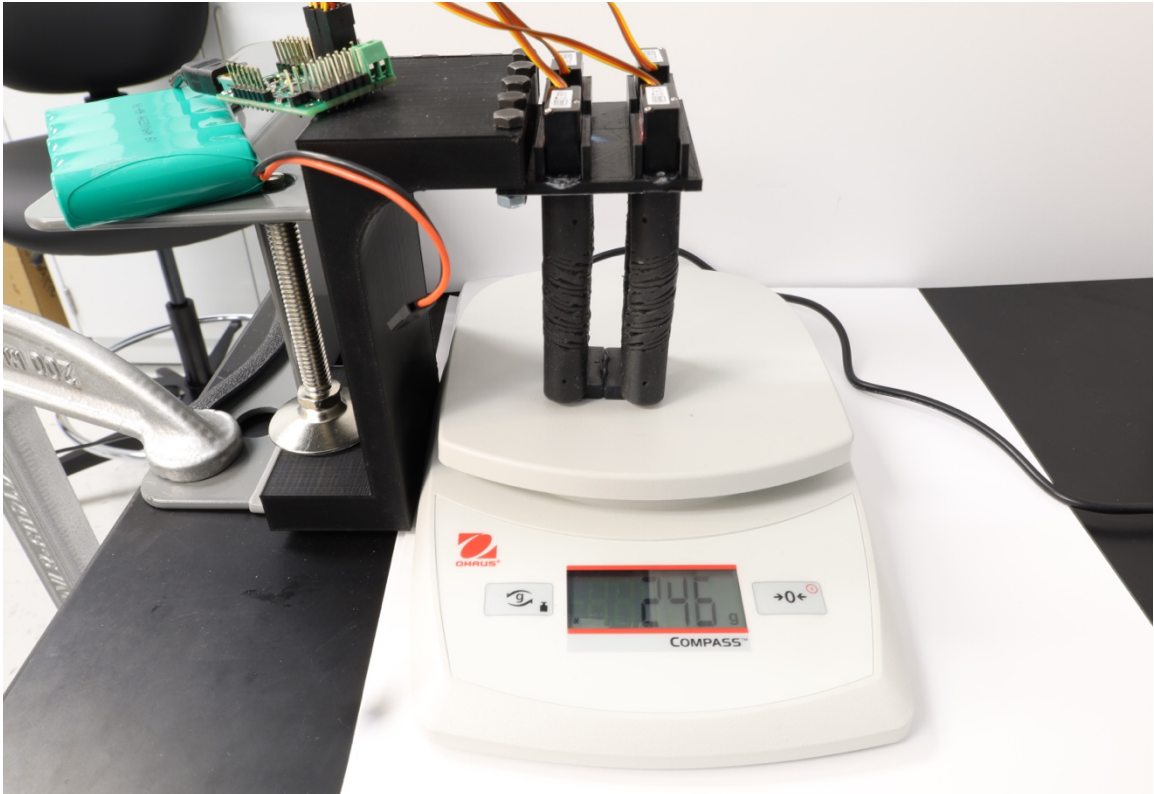

**Figure S6.** Blocked force testing set-up. A Stilted 0.5x Leg is shown.

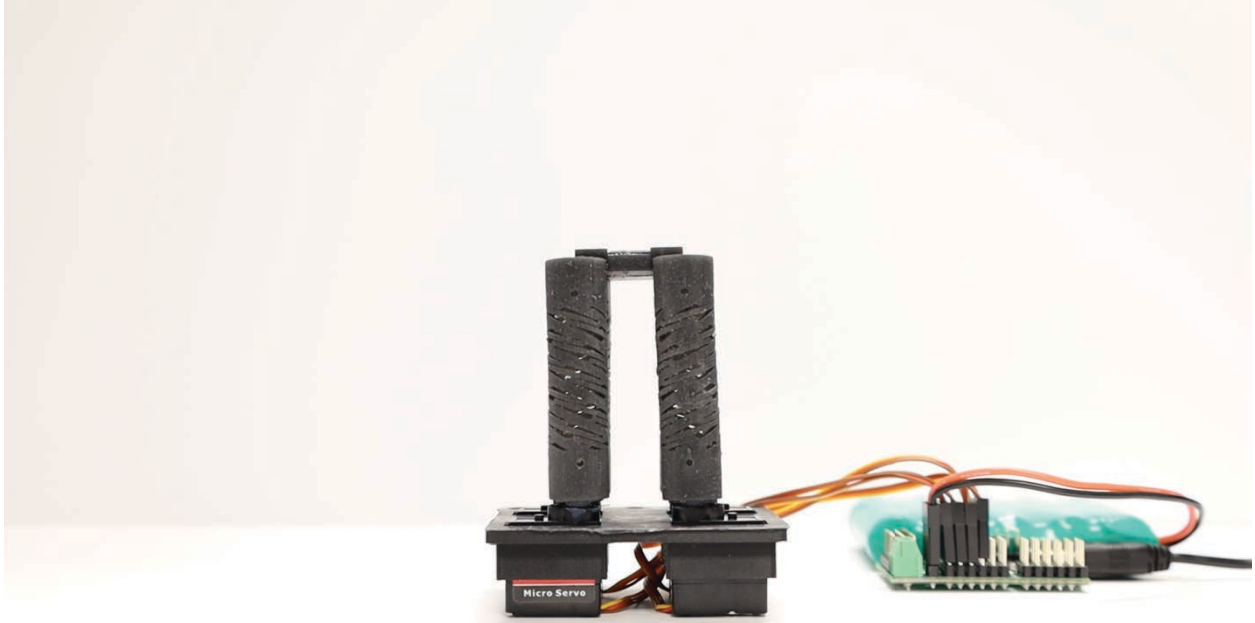

**Movie S1.** Multi-DOF actuations of the 0.5x HSA Leg (stills are shown in Fig. 4b).

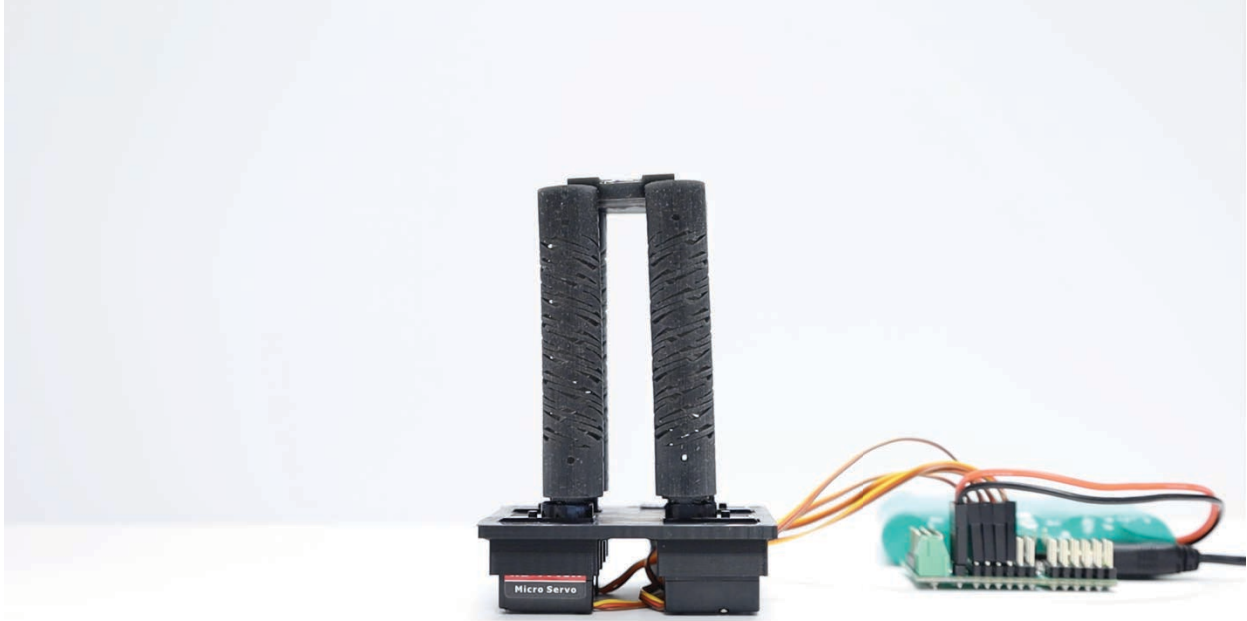

**Movie S2.** Multi-DOF actuations of the Elongated 0.5x HSA Leg (stills are shown in Fig. 4c).

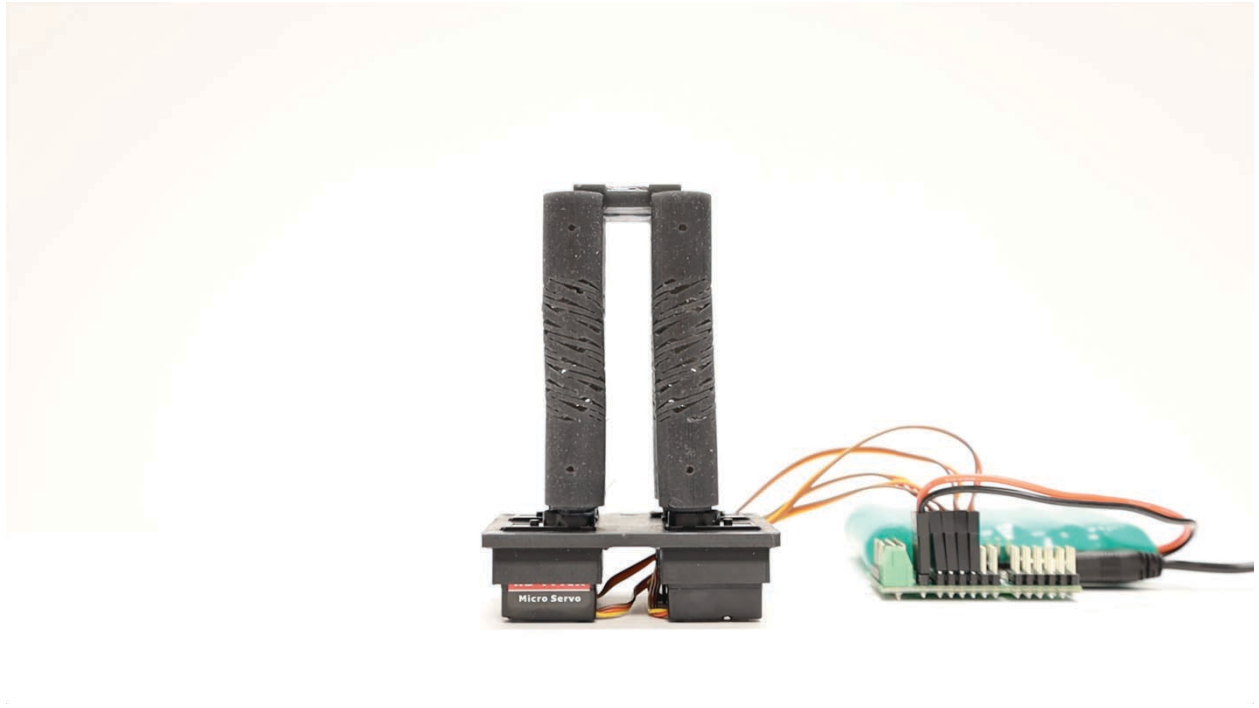

**Movie S3.** Multi-DOF actuations of the Stilted 0.5x HSA Leg (stills are shown in Fig. 4d).

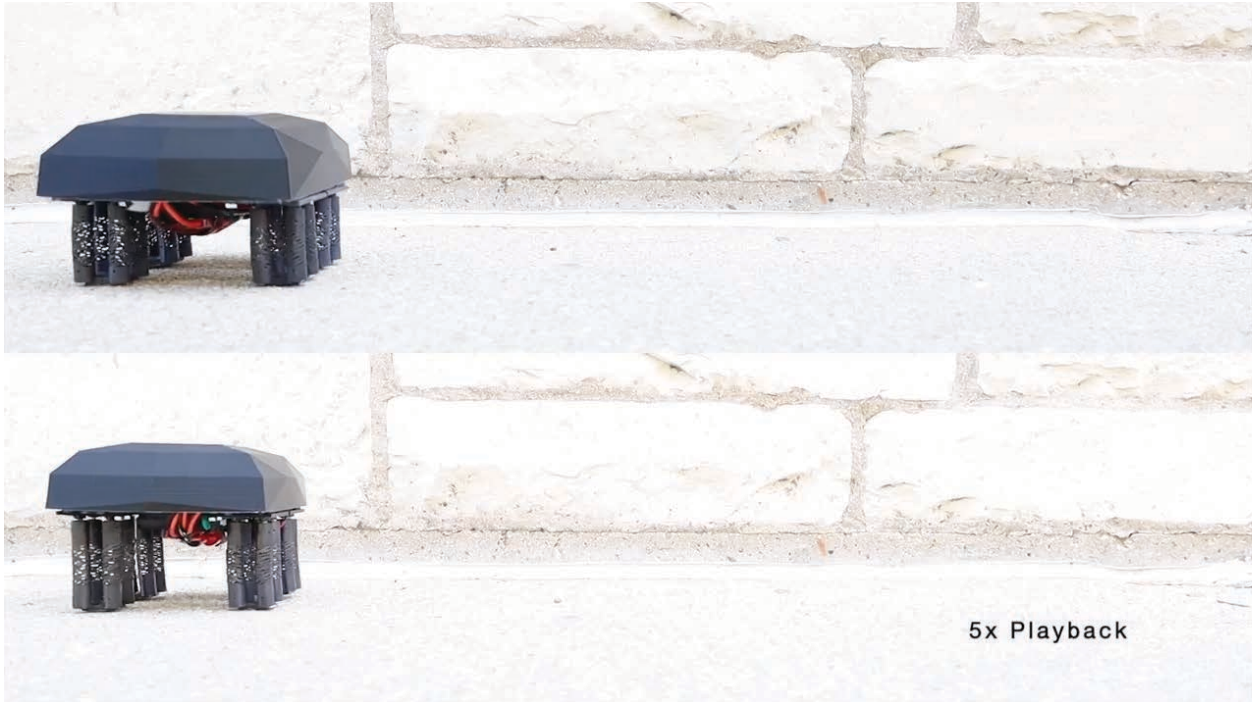

**Movie S4.** Untethered soft robots walking on concrete sidewalk. The top and bottom clips show the quadrupeds constructed from the 0.5x Legs and Stilted 0.5x Legs, respectively. Video playback is 5x.
